# Supplementary material
Source: Springer Nature journal article supplement (https://www.springerprofessional.de/resource/supplementary/13677_2013_45_MOESM7_ESM.pdf/10743474)

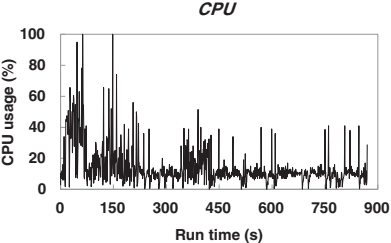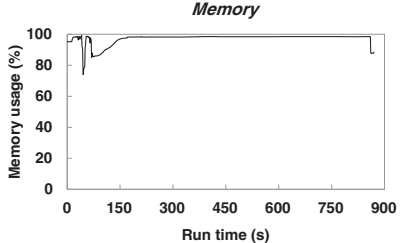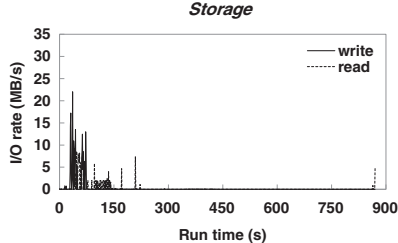

**(a) Map node**

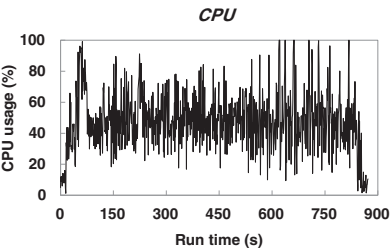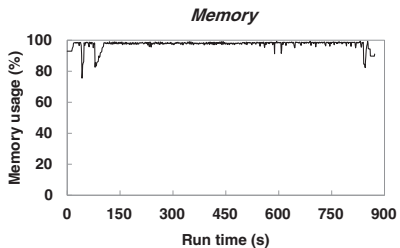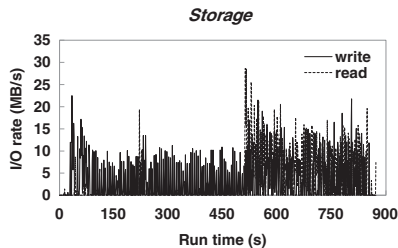

**(b) Reduce node**

Supplement: MOESM7 [file 10743474]
